# Supplementary material for: Acute neuropathological consequences of short-term mechanical ventilation in wild-type and Alzheimer’s disease mice
Source: PubMed Central journal article supplement (PMC6387486; doi:10.1186/s13054-019-2356-2), 2019-02-22

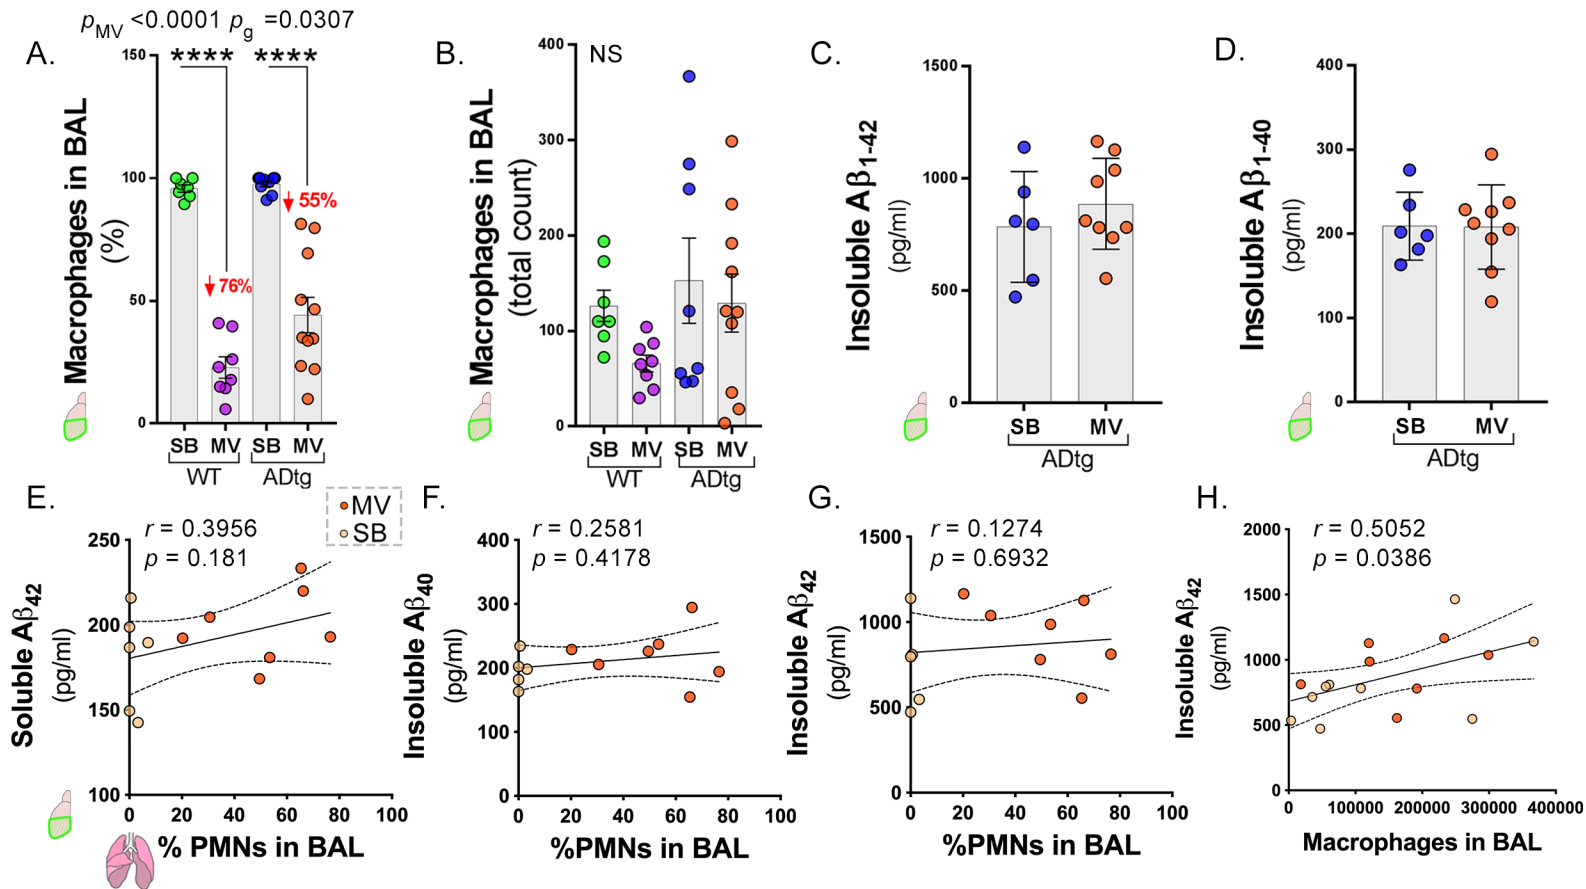

Suppl. Fig.1

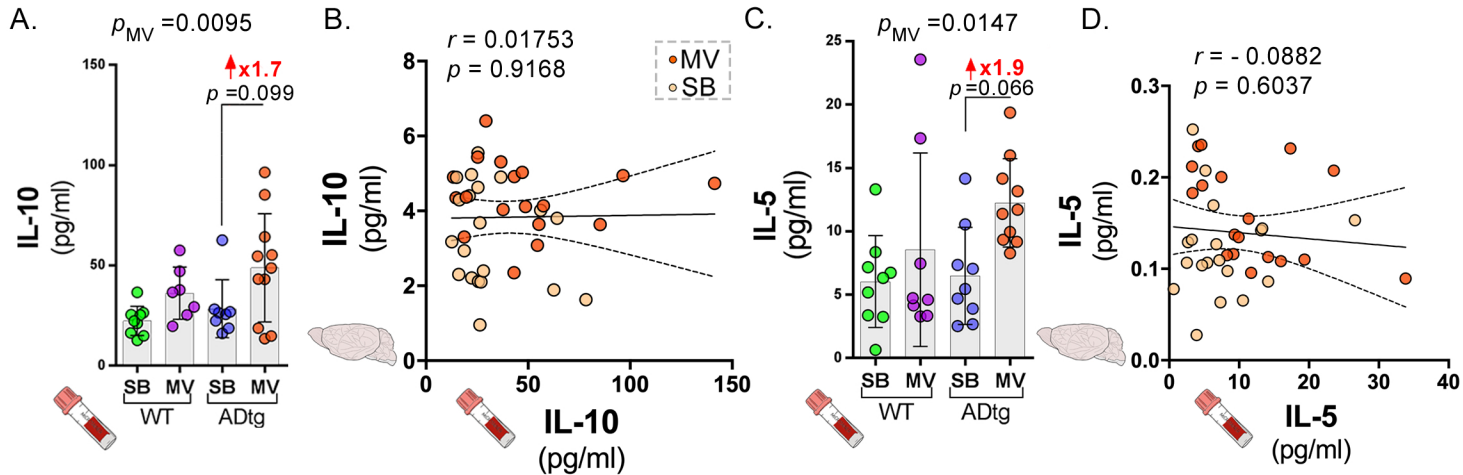

Suppl. Fig 2

A.  $p_{MV} = 0.0013$   $p_g < 0.0001$

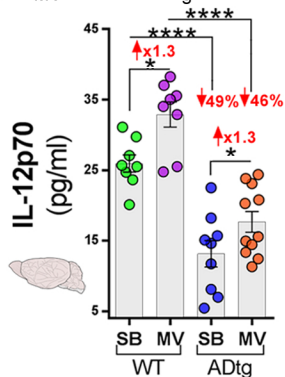

$p_i = 0.0214$   $p_{MV} = 0.0288$

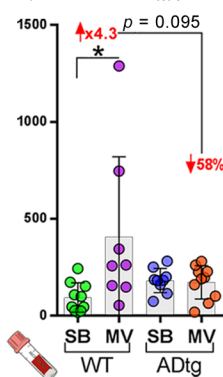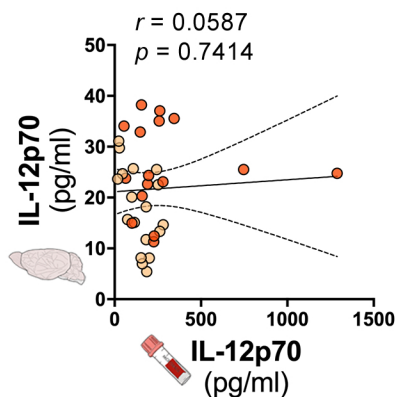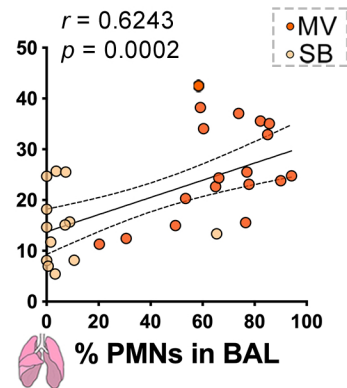

B.

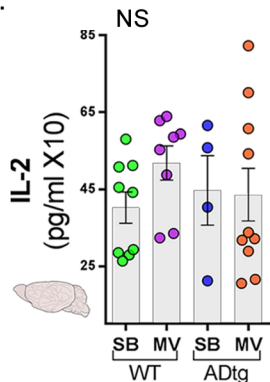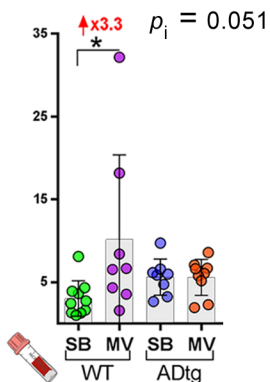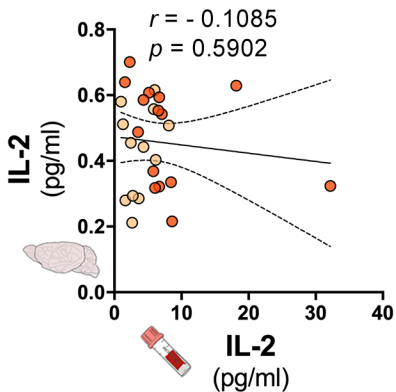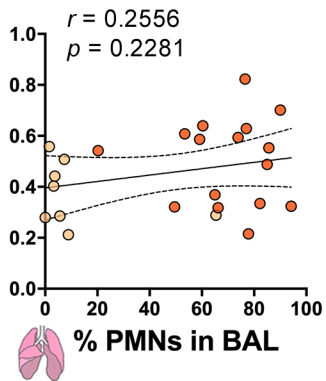

Suppl. Fig. 3

A.

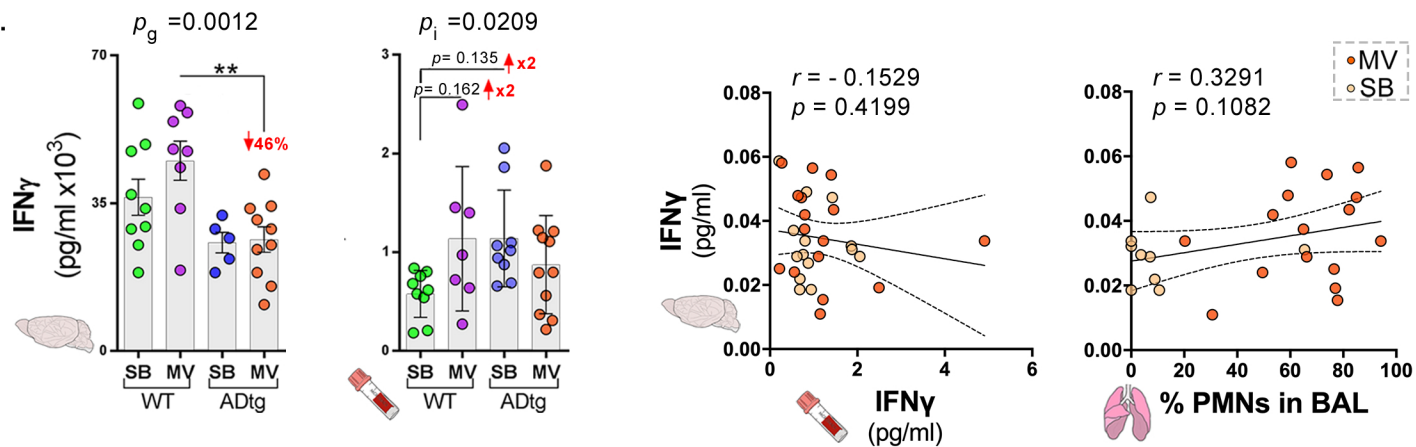

B.

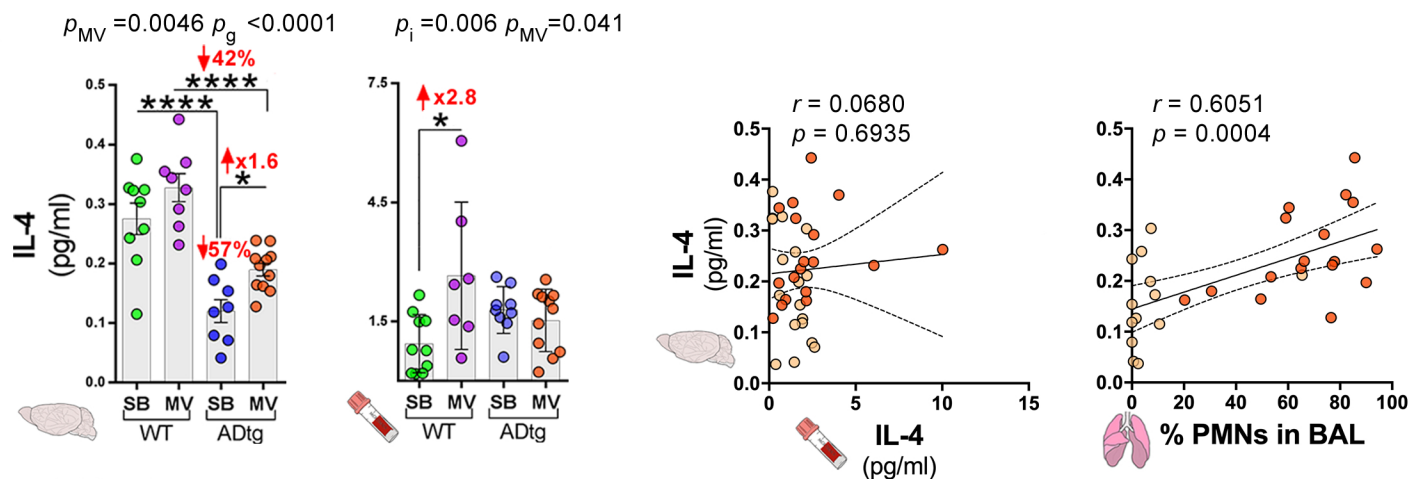



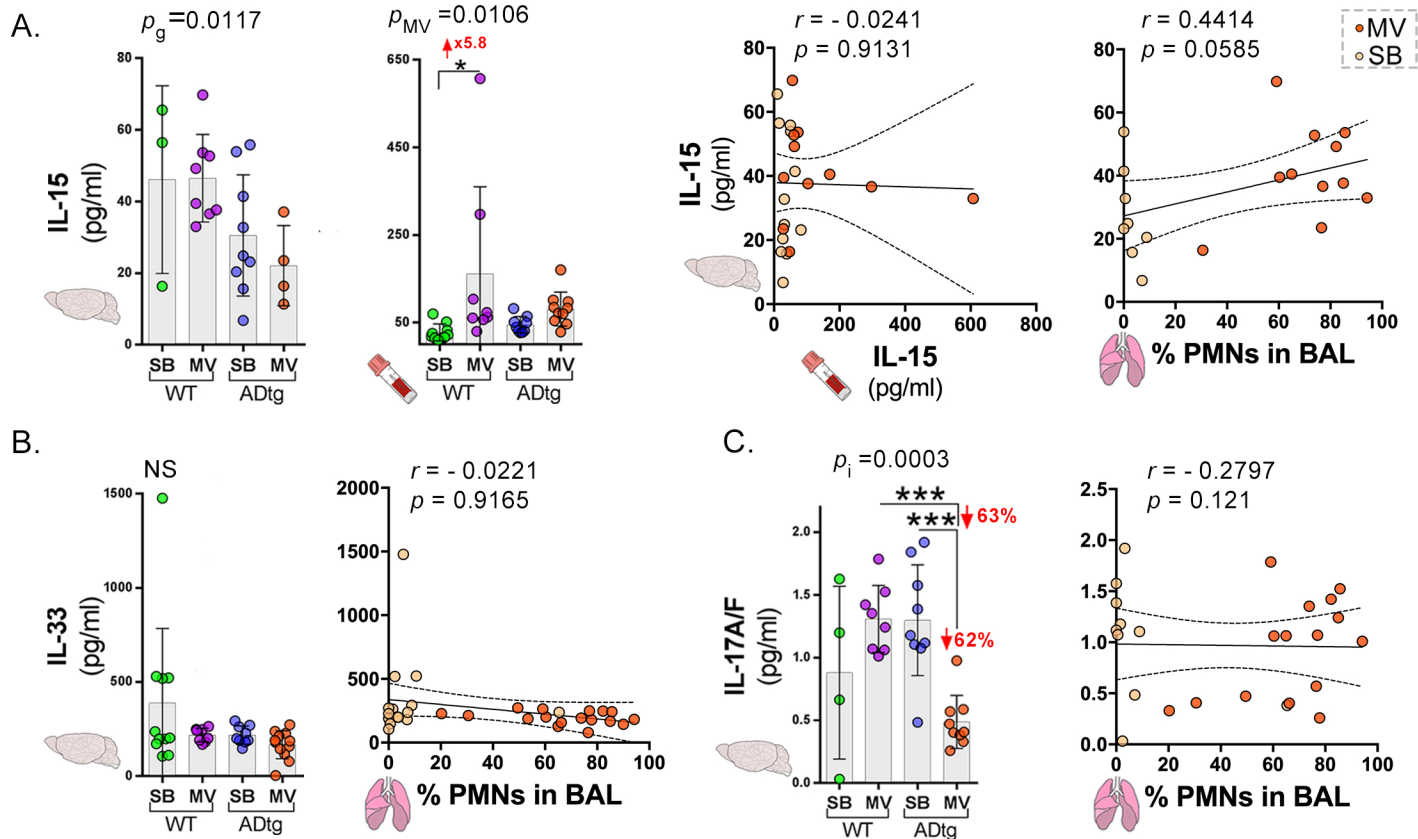

Suppl. Fig. 5

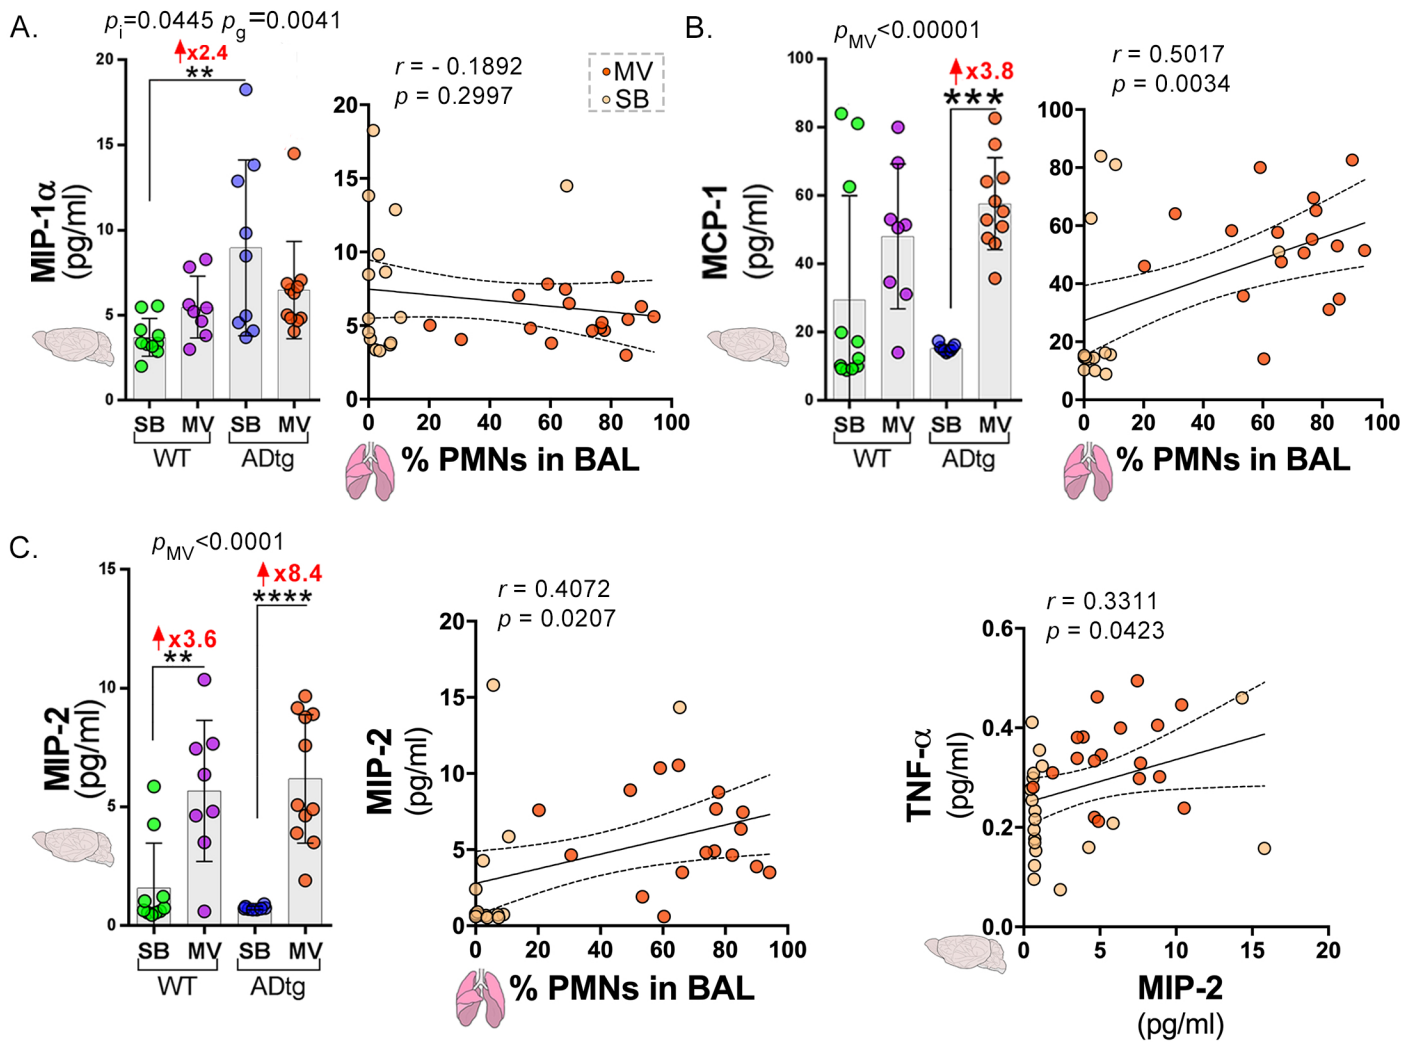

Suppl. Fig. 6

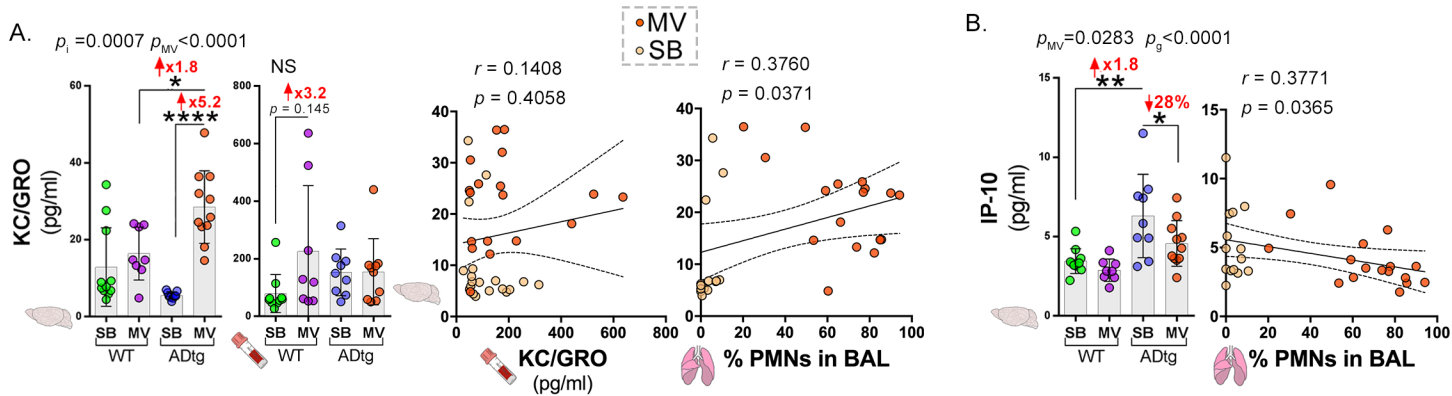

Suppl. Fig. 7

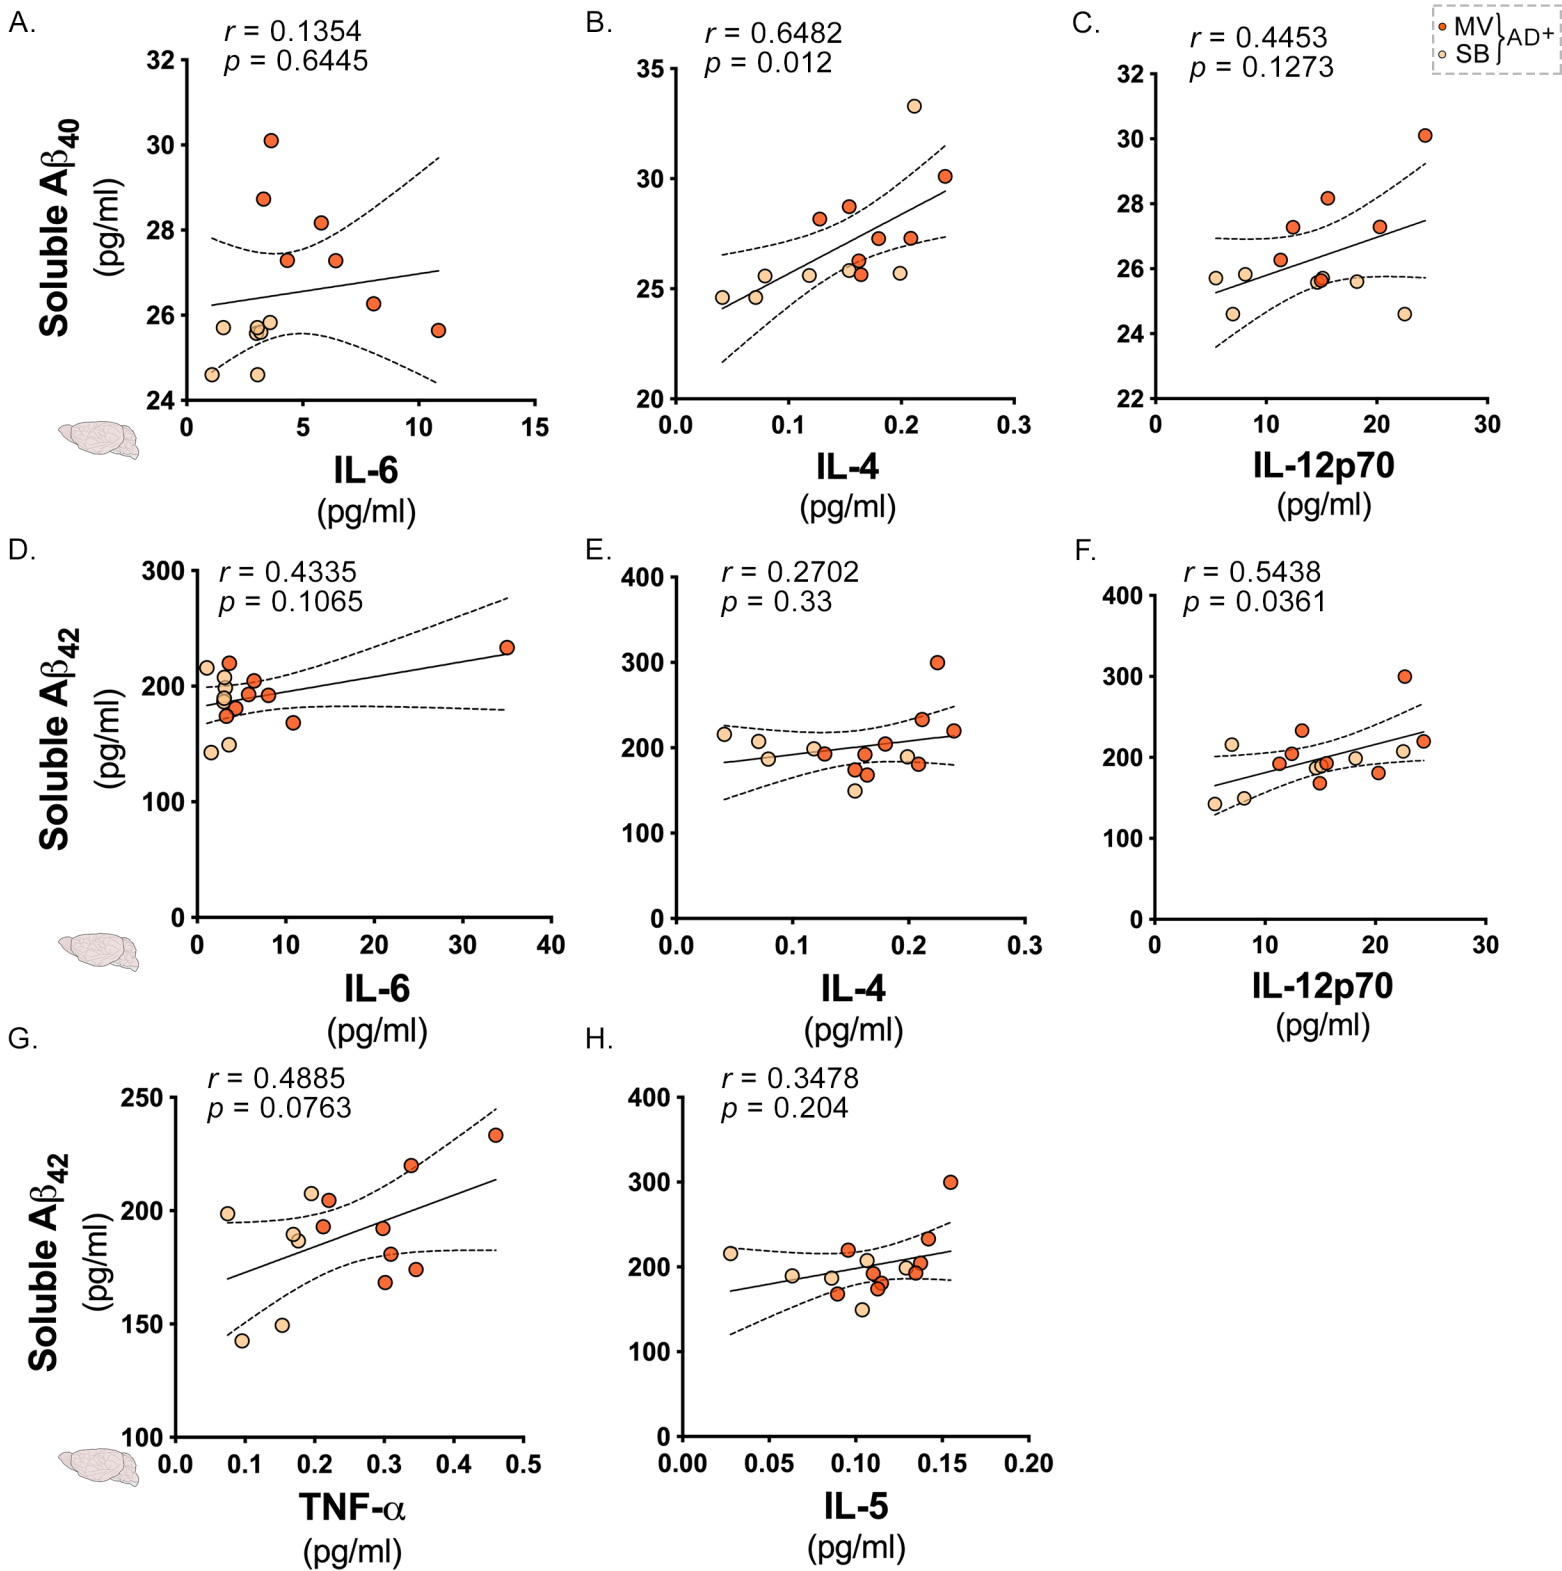

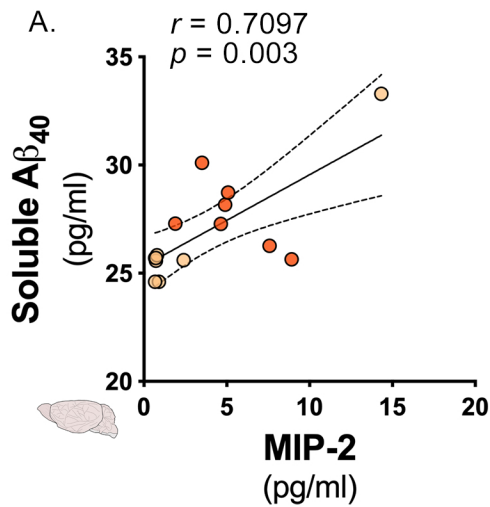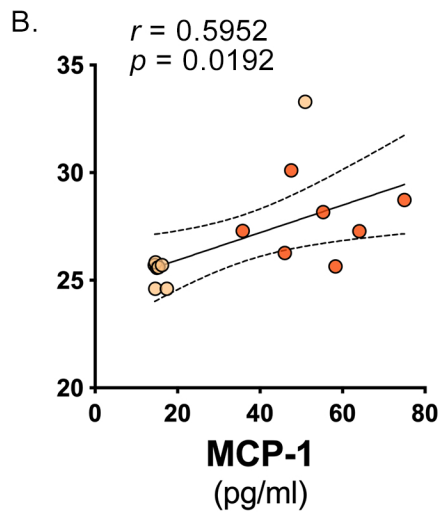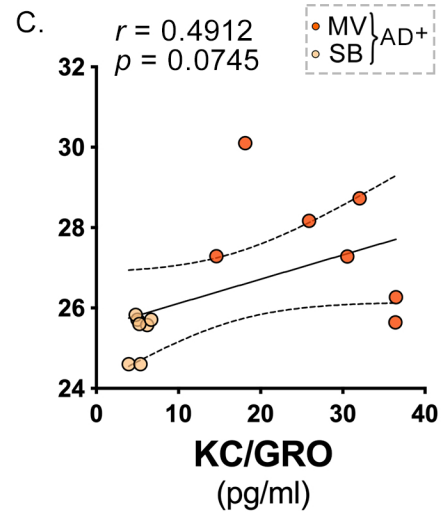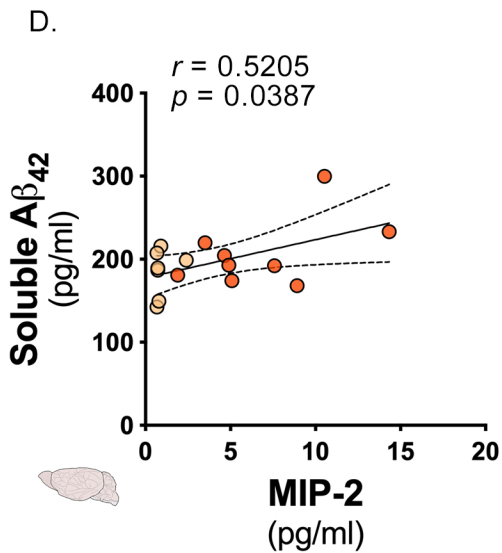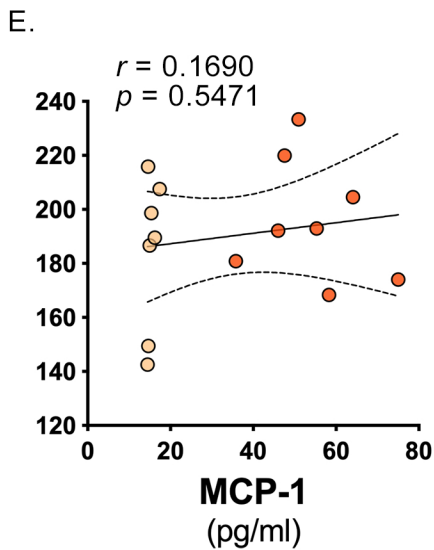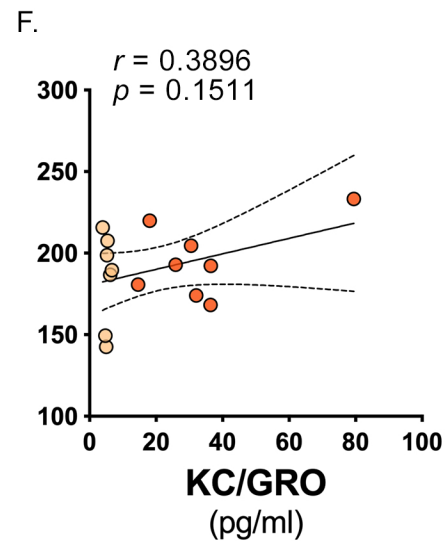

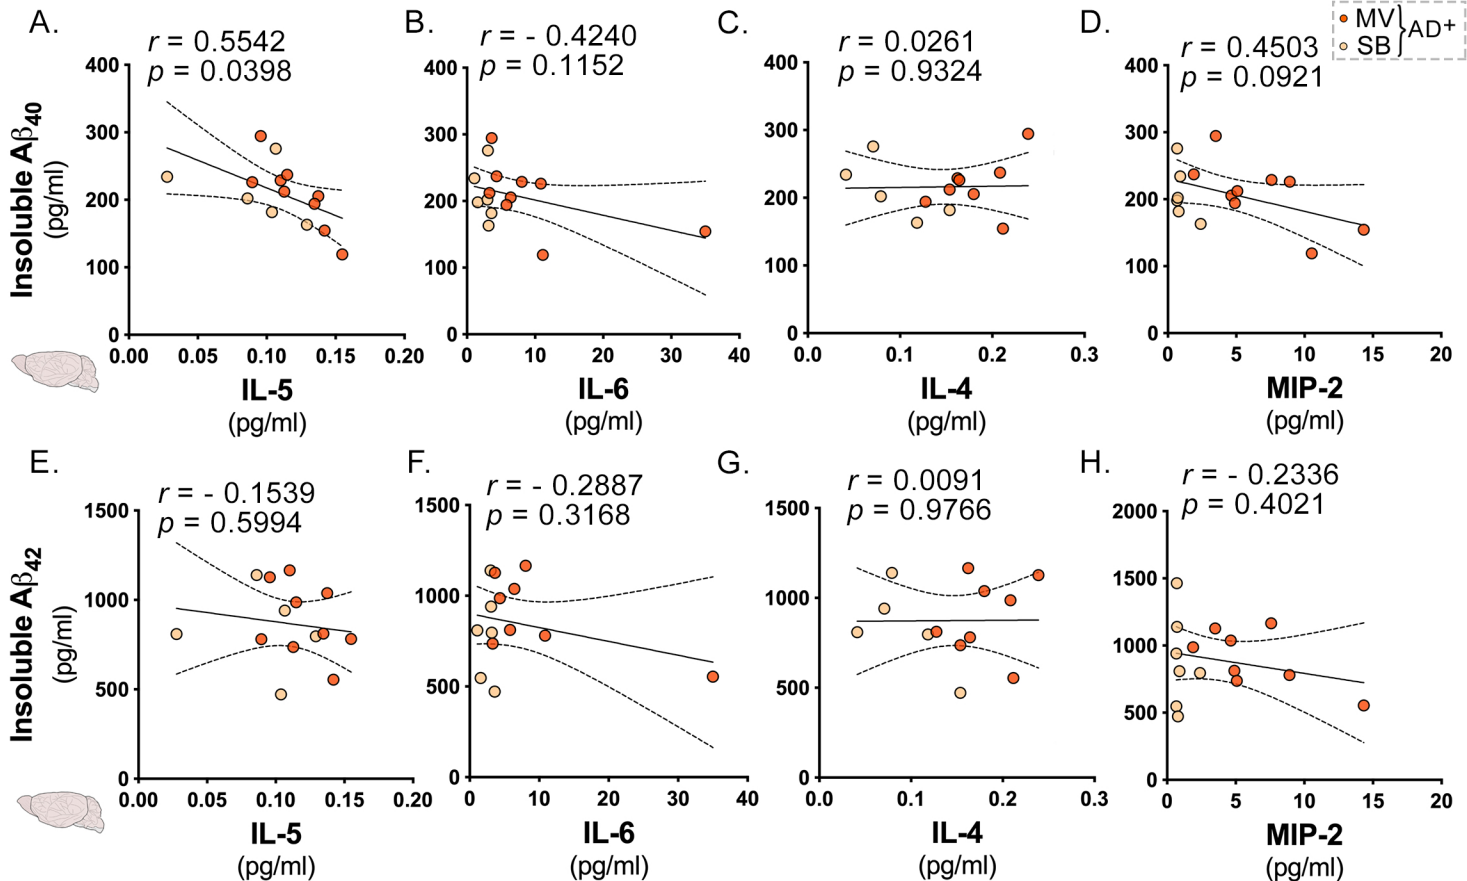

Suppl. Fig. 10

A.

## Texas Red

WT (SB)

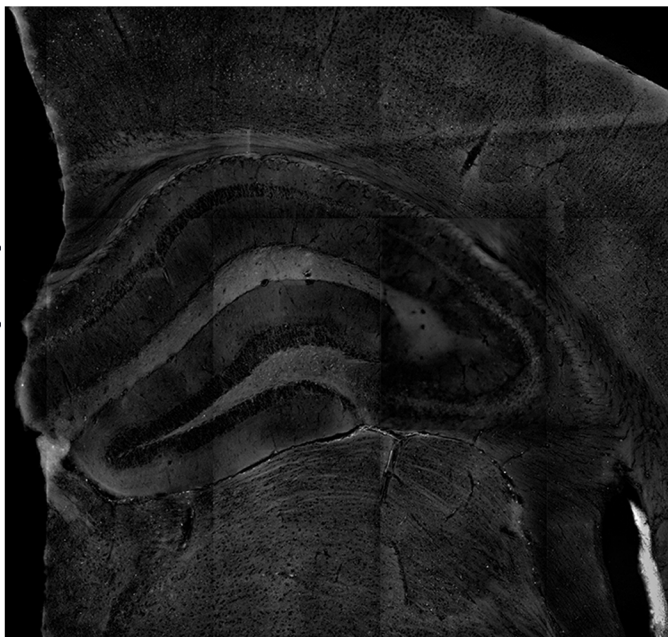

ADtg (SB)

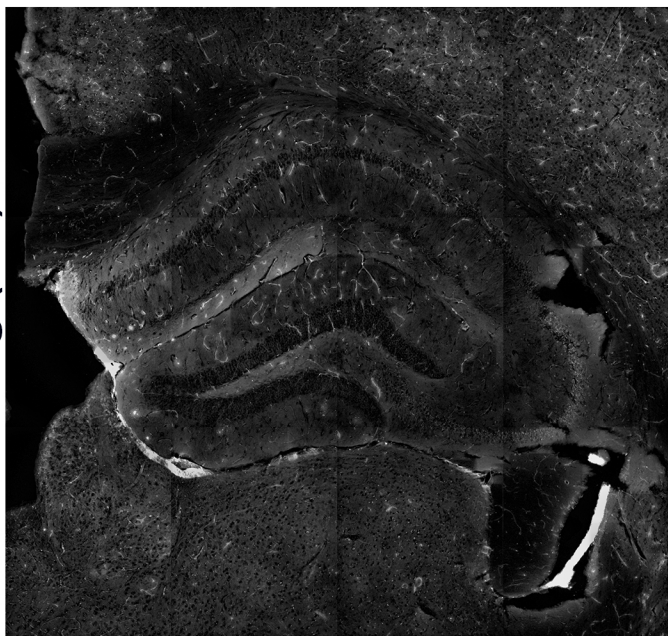

B.

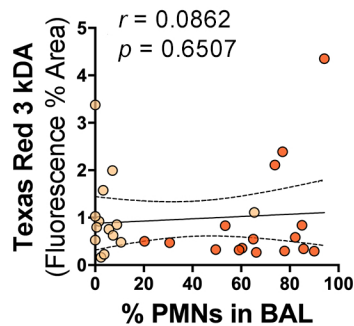

C.

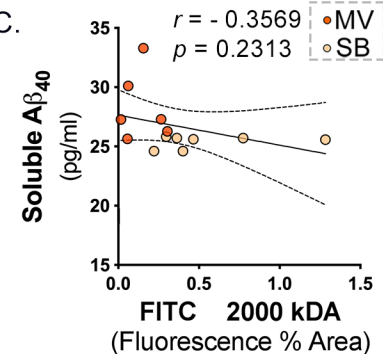

D.

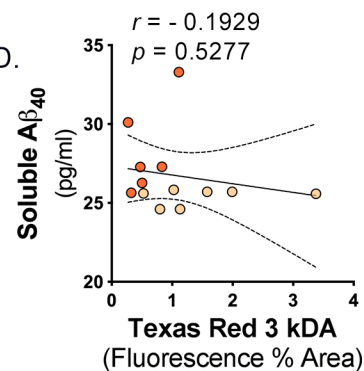

E.

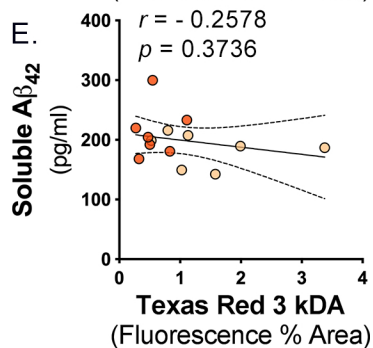

F.

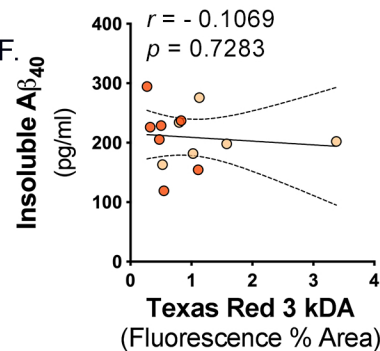

G.

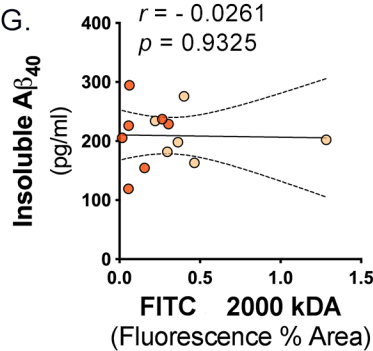

H.

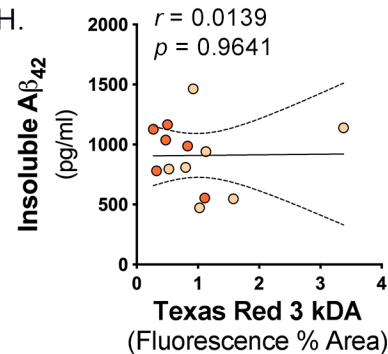

I.

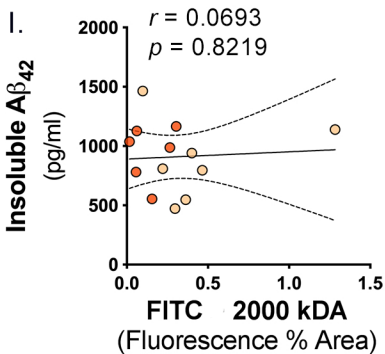

Supplement: 13054_2019_2356_MOESM1_ESM.pdf [file 13054_2019_2356_MOESM1_ESM.pdf]
